# Supplementary material for: Roussin's black salt decorated Cu-doped ZnO nanoparticles for bacterial inhibition
Source: Royal Society of Chemistry journal article supplement (doi:10.1039/d3nj02661b), 2023-01-01
Supplement: d3nj02661b1.pdf [file d3nj02661b1.pdf]

## Roussin's black salt decorated Cu-doped ZnO nanoparticles for bacteria inhibition

Lingling Lv, Yaoqing Chu\*, Lianjiang Tan\*

School of Materials Science and Engineering, Shanghai Institute of Technology, Shanghai 201418,  
China.

\*Corresponding author. Email: tanlijiang@126.com; yq\_chu@sit.edu.cn.

### Supplementary materials

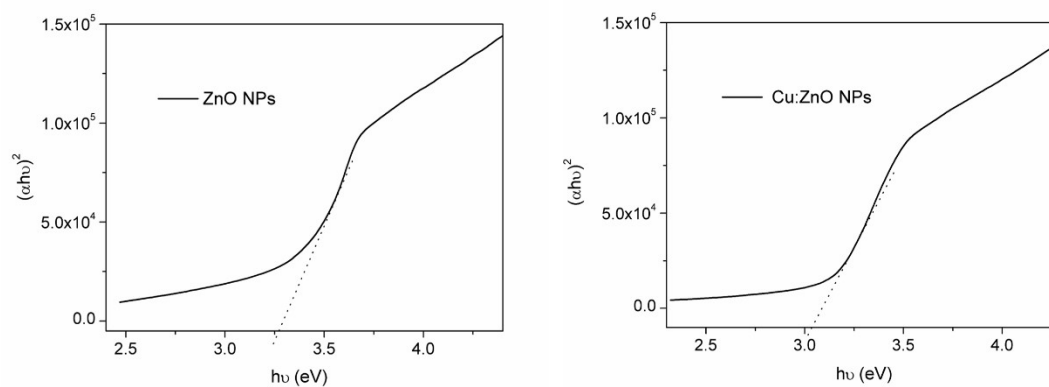

**Fig. S1.** Tauc plots based on the data in Fig. 2b for ZnO and Cu:ZnO NPs to determine their band gap.

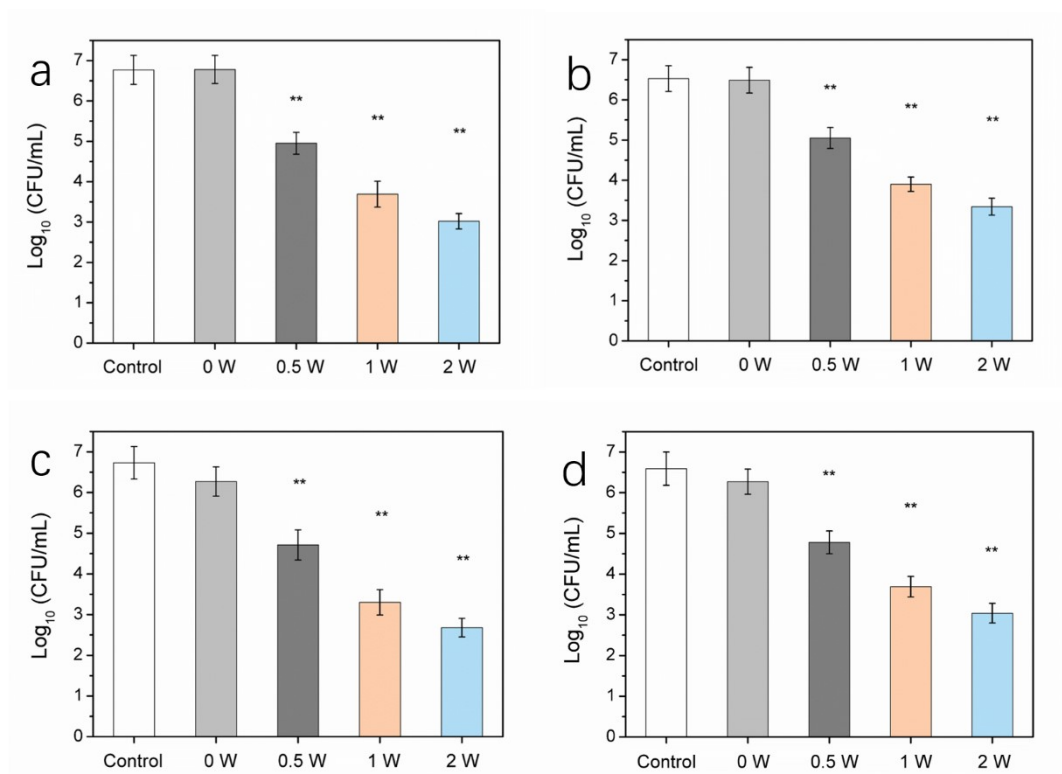

**Fig. S2.** Antibacterial activity of RBS against *S. aureus* (a) and *E. coli* (b), and RBS@ZnO NPs against *S. aureus* (c) and *E. coli* (d) under 543 nm laser irradiation for 10 min at varied power outputs. The data are presented as average  $\pm$  standard deviation (n = 3). Statistical significance: \*P < 0.05, \*\*P < 0.01.

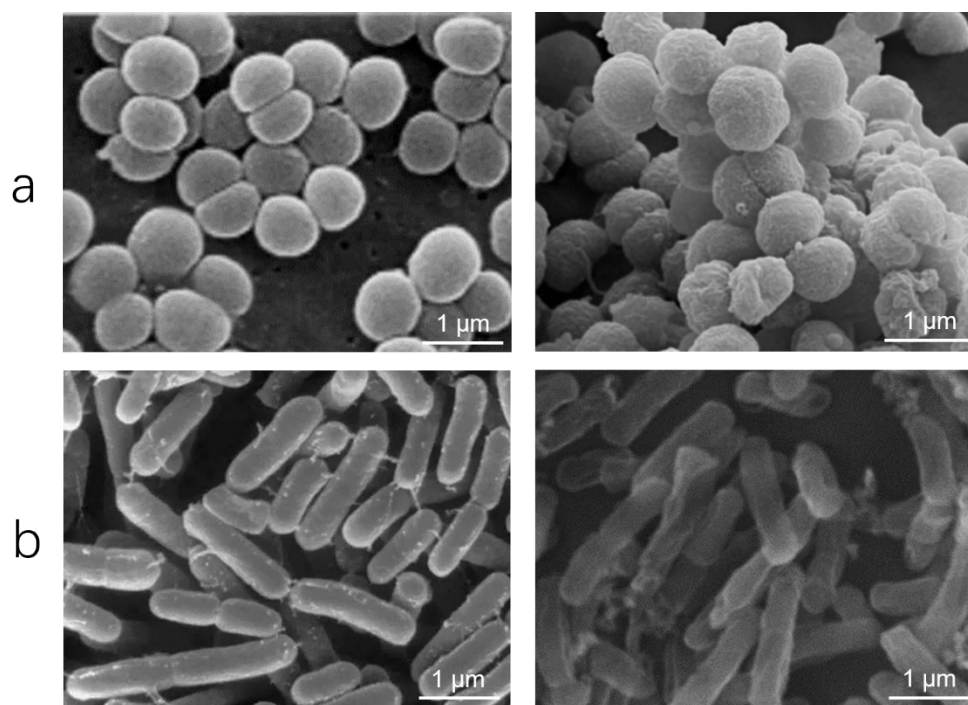

**Fig. S3.** (a) SEM images of untreated *S. aureus* (left) and *S. aureus* treated with RBS@Cu:ZnO NPs under 543 nm laser irradiation (2 W, 10 min) (right); (b) SEM images of untreated *E. coli* (left) and *E. coli* treated with RBS@Cu:ZnO NPs under 543 nm laser irradiation (2 W, 10 min) (right).
